# Supplementary material
Source: HighWire-hosted journal article supplement (https://gh.bmj.com/content/6/1/e004227)
Supplement: inline-supplementary-material-3 [file inline-supplementary-material-3.pdf]

**LIST OF CRITERIA**

| <b>Criteria</b>             | <b>Definition</b>                                                                                                                                                                                                                                                                             |
|-----------------------------|-----------------------------------------------------------------------------------------------------------------------------------------------------------------------------------------------------------------------------------------------------------------------------------------------|
| 1. Validity                 | The degree to which the data measures what the indicator claims.                                                                                                                                                                                                                              |
| 2. Feasibility              | The degree of confidence in how likely data will be available at the data source provided; if there are additional costs required to obtain the data either through field work or payment to private databases; and mechanism of coordination between the stakeholders for smooth operations. |
| 3. Local relevance          | The appropriateness of an indicator in regards to preparedness within the country context.                                                                                                                                                                                                    |
| 4. Political importance     | To what degree information captured addresses an area of concern to policymakers; potential to generate change based on country-specific political context.                                                                                                                                   |
| 5. Financial commitment     | Based on the availability of government funding for data generation. Includes length of commitment and type of commitment (e.g. budget line versus one-off).                                                                                                                                  |
| 6. Consistency              | The degree in which there is consistency throughout country on the way that the indicator is defined, collected, and reported (i.e. across sub-national entities), and uniformity of tools and procedures.                                                                                    |
| 7. Regional comparability   | The degree in which there is consistency throughout country on the way that the indicator is defined, collected, and reported (i.e. across sub-national entities), and uniformity of tools and procedures.                                                                                    |
| 8. Data quality/ Legitimacy | The degree to which there is high confidence that the data collected represents the real-world construct it refers to; belief that data collected truthfully represents measurement reported.                                                                                                 |
| 9. Availability             | The degree to which data are accessible for use for preparedness monitoring. Includes the availability of data at a single point in time (e.g., baseline data) and over time, as appropriate.                                                                                                 |
| 10. Timeliness              | The degree in which data is collected on-time based on previously defined timelines; the earliest accessibility of data for sharing with NPHI after initial collection.                                                                                                                       |
| 11. Sustainability          | This refers to consistency of data over time.                                                                                                                                                                                                                                                 |
